# Supplementary material for: Coculture of cancer cells with platelets increases their survival and metastasis by activating the TGFβ/Smad/PAI-1 and PI3K/AKT pathways
Source: PubMed Central journal article supplement (PMC10496510; doi:10.7150/ijbs.85986), 2023-08-15
Supplement: ijbsv19p4259s1.pdf [file ijbsv19p4259s1.pdf]

**Coculture of cancer cells with platelets increases their survival and metastasis by  
activating the TGF $\beta$ /Smad/PAI-1 and PI3K/AKT pathways**

Haibo Tong<sup>1</sup>, Koukou Li<sup>1</sup>, Muya Zhou<sup>1</sup>, Renfei Wu<sup>1</sup>, Hongmei Yang<sup>1</sup>, Zheng Peng<sup>1</sup>,  
Qi Zhao<sup>1,2</sup>, Kathy Qian Luo<sup>1,2\*</sup>

<sup>1</sup>Faculty of Health Sciences, University of Macau, Taipa, Macao SAR, China.

<sup>2</sup>Ministry of Education Frontiers Science Center for Precision Oncology, University of Macau.

\*Corresponding author: Kathy Qian Luo; E-mail: [kluo@um.edu.mo](mailto:kluo@um.edu.mo)

## Supplementary Figures

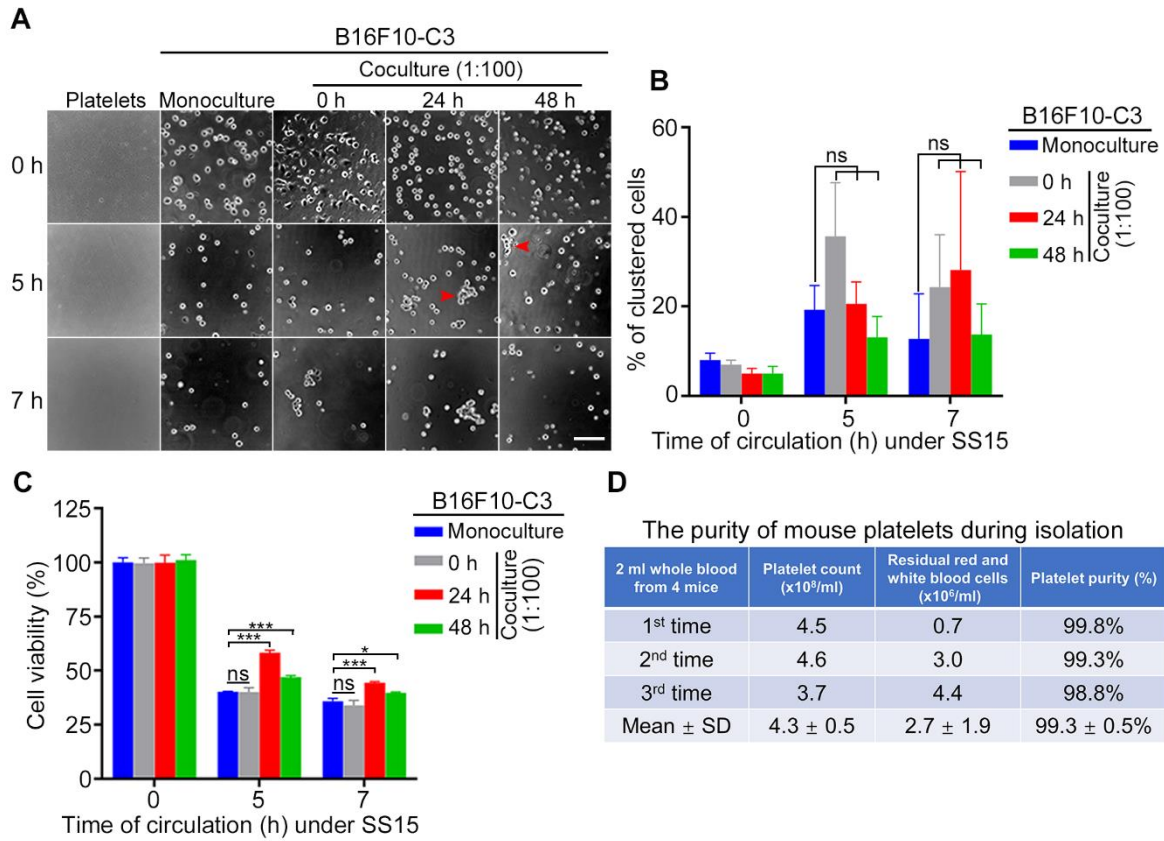

**Fig. S1.** Results for B16F10-C3 cells cocultured with platelets at a 1:100 ratio under SS15 treatment. **(A)** Representative phase contrast images of mouse platelets, monocultured and cocultured cells (cocultured with murine platelets at 1:100 for different time points) after 0, 5 and 7 h of SS treatment. The red arrowhead indicates clustered cells. Scale bar, 100  $\mu$ m. **(B)** Quantified % of clustered cells. **(C)** Cell viability was determined by the MTT assays. The data are shown as the mean  $\pm$  SD. **(D)** The purity of mouse platelets during isolation.

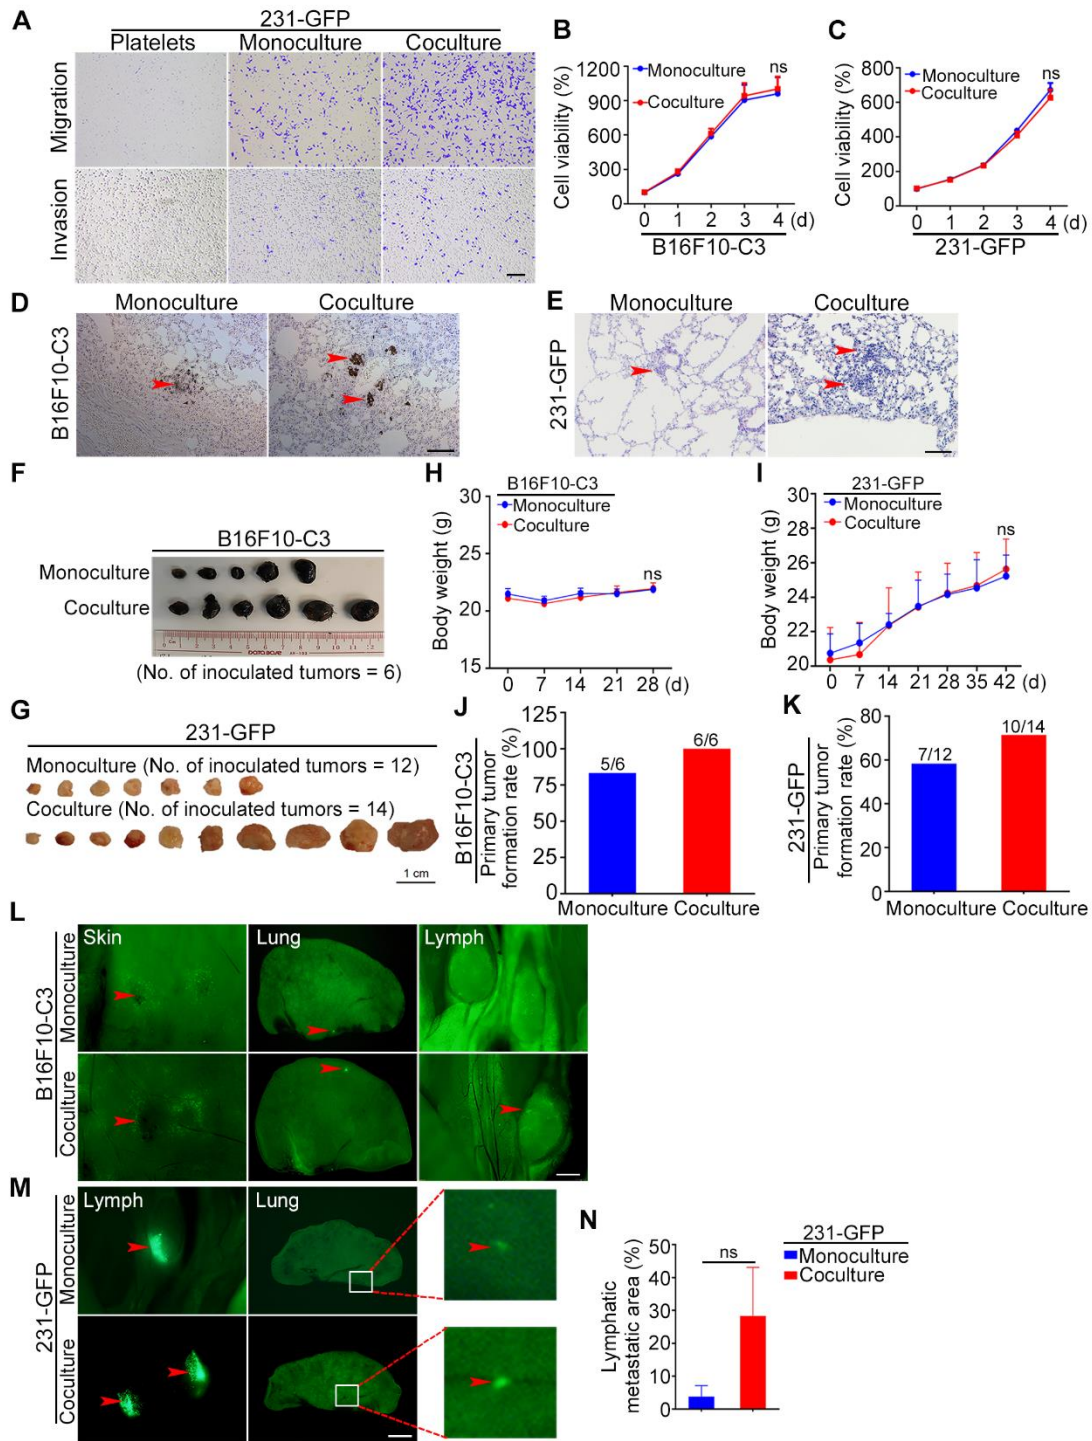

**Fig. S2.** Coculture induced tumorigenesis and metastasis in orthotopic tumor models. **(A)** Representative image of the Transwell migration and invasion assays for human platelets, monocultured and cocultured 231-GFP cells. Scale bar, 200  $\mu$ m. **(B and C)** MTT assays were used to compare cell proliferative ability between monocultured and cocultured B16F10-C3 and 231-GFP cells. **(D and E)** H&E staining images of lung tissues under the indicated conditions. Scale bar, 20  $\mu$ m. **(F and G)** Images of the primary tumors inoculated with monocultured and cocultured B16F10-C3 (No. of mice = 6) and 231-GFP cells (No. of mice = 6 to 7). **(H and I)** Quantification of mouse body weight. The results represent the mean  $\pm$  SEM.

(**J** and **K**) Quantified results of the primary tumor formation rate. (**L** and **M**) Images of metastatic tumors located in different organs in B16F10-C3 and 231-GFP cells (No. of mice = 6 to 7). The white box shows the enlarged view. The red arrowhead indicates metastatic tumors. Scale bars, 1 mm. (**N**) Quantified results of the iliac lymphatic metastasis area in 231-GFP cells. The data are shown as the mean  $\pm$  SD. ns, no significance.

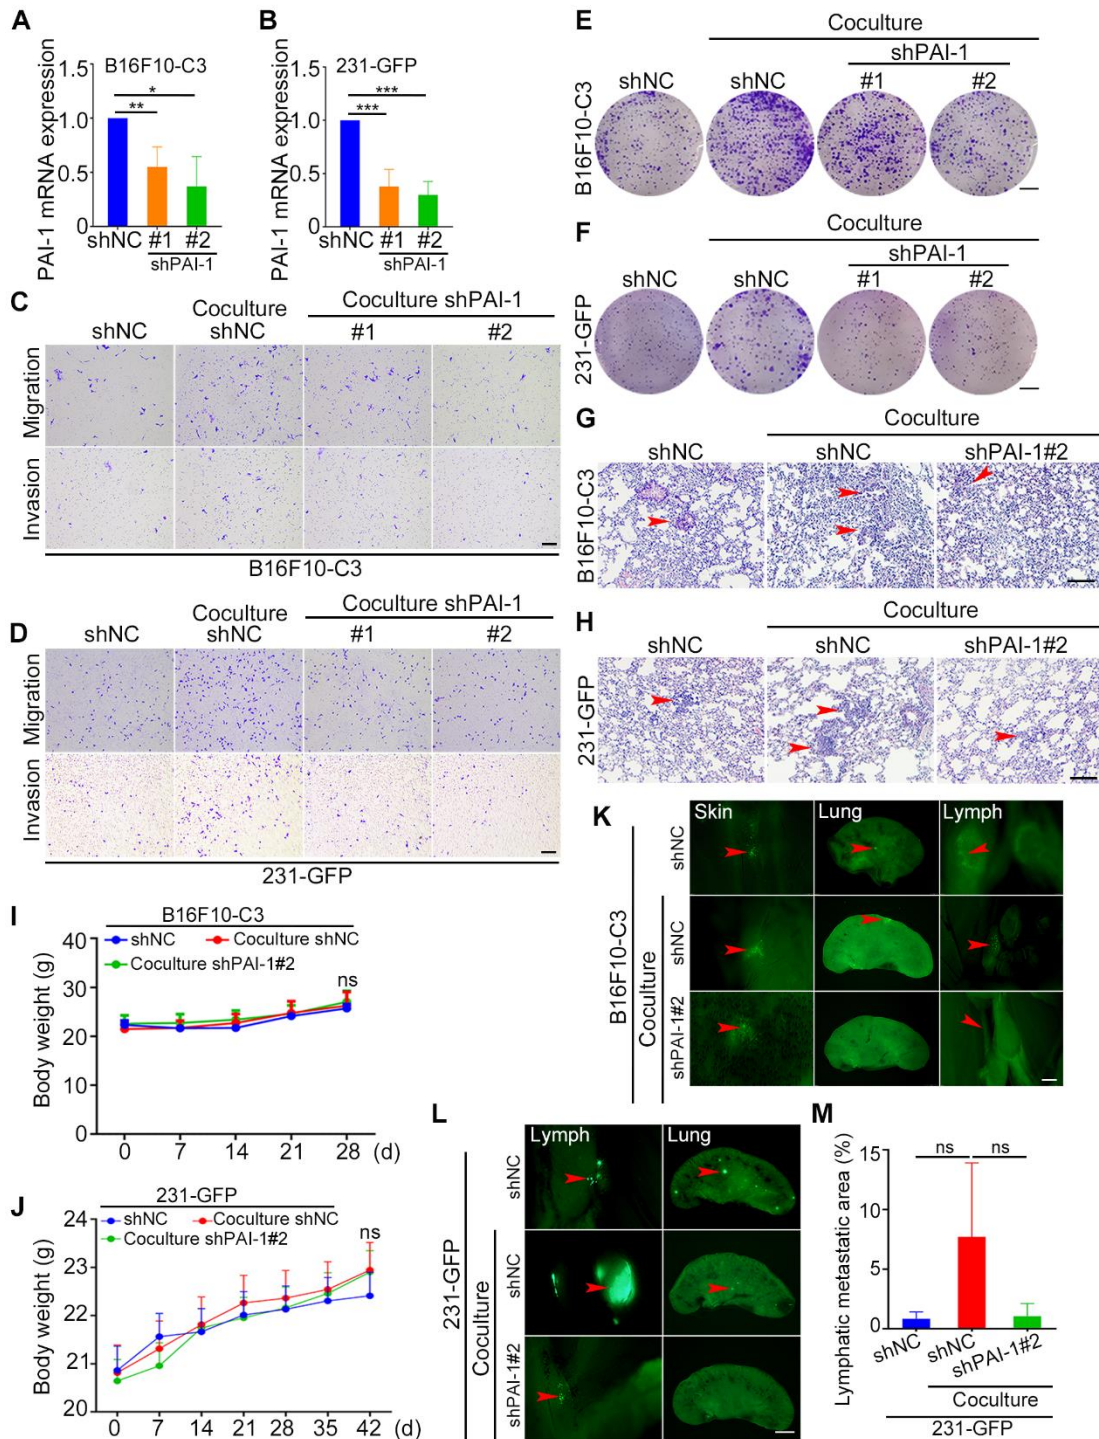

**Fig. S3.** Knockdown of PAI-1 effectively reduced the tumorigenesis and metastasis abilities of B16F10-C3 and 231-GFP cells. (A and B) qRT-PCR results showing the knockdown efficiency of PAI-1 by using shRNAs in B16F10-C3 and 231-GFP cells. (C and D) Transwell migration and invasion assays for monocultured shNC, cocultured shNC and cocultured shPAI-1#1 and shPAI-1#2 B16F10-C3 and 231-GFP cells. Scale bar, 200  $\mu$ m. (E and F) Colony formation assay for the monocultured shNC, cocultured shNC and cocultured shPAI-1#1, shPAI-1#2 of B16F10-C3 and 231-GFP cells. Scale bar, 5 mm. (G and H) H&E staining assays of lung lobes inoculated with the indicated cells. Scale bar, 20  $\mu$ m. (I and J) Quantified results of mouse

body weight after knocking down PAI-1 in B16F10-C3 and 231-GFP cells. **(K and L)** Representative fluorescent images of metastatic tumors located in different organs after injection of B16F10-C3 (No. of mice = 5) and 231-GFP cells (No. of mice = 7 to 8) with PAI-1 knockdown. The red arrowhead indicates metastatic tumors. Scale bars, 1 mm. **(M)** Quantified results of the iliac lymphatic metastasis area in 231-GFP cells. The data are shown as the mean  $\pm$  SD. \* $P < 0.05$ , \*\* $P < 0.01$ , \*\*\* $P < 0.001$  and ns, no significance.



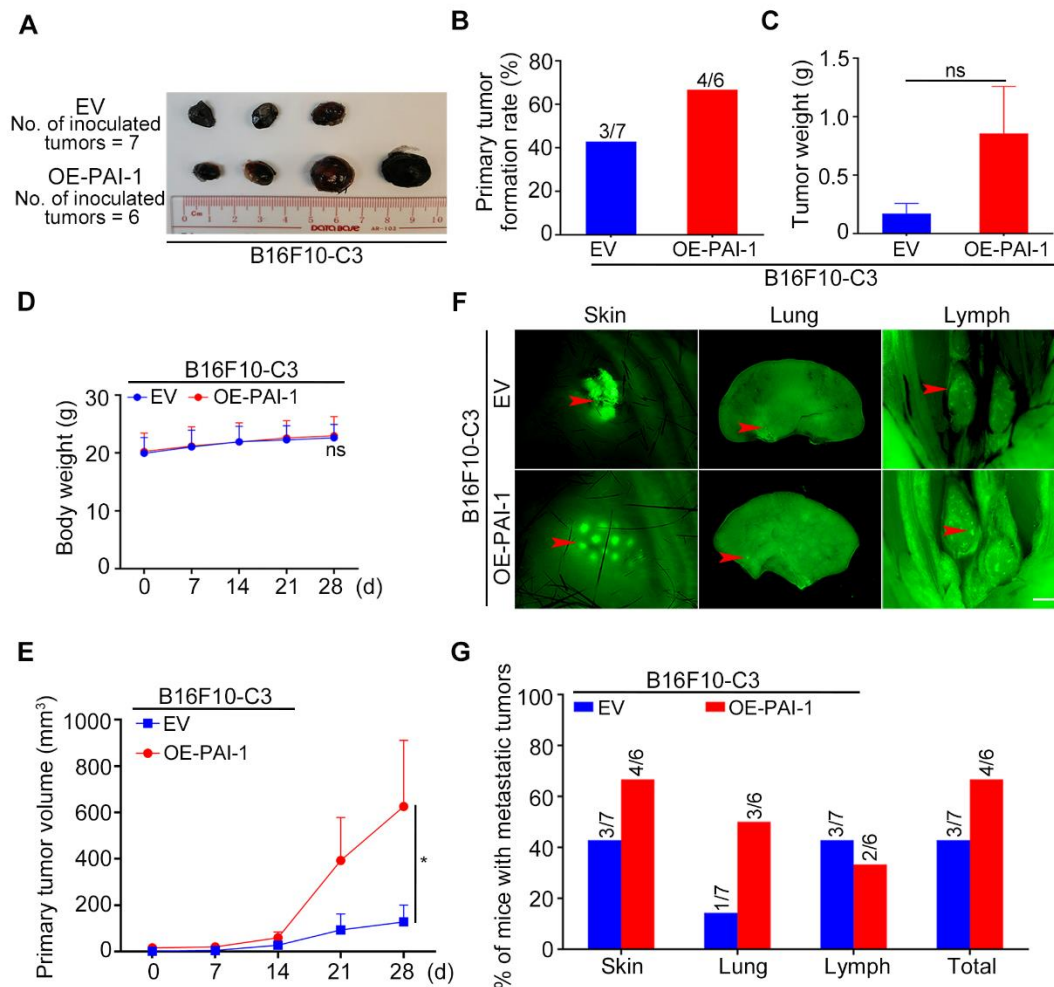

**Fig. S4.** Overexpression of PAI-1 promoted B16F10-C3 cell tumorigenesis and metastasis. **(A)** Representative image of the primary tumors after subcutaneous injection of B16F10-C3 cells into C57BL/6J mice ( $n = 6$  to  $7$ ). **(B and C)** Quantification of the primary tumor formation rate and tumor weight of EV and OE-PAI-1 in B16F10-C3 cells. The results represent the mean  $\pm$  SEM. **(D)** Quantified results of mouse body weight. **(E)** Quantified results of primary tumor volume. The results represent the mean  $\pm$  SEM. **(F)** Representative images of metastatic tumors in the distant skin, lung, and iliac lymph nodes in the EV and OE-PAI-1 groups. The red arrowhead indicates metastatic tumors. Scale bars, 1 mm. **(G)** Quantification of the metastatic rate in different organs in mice in the EV and OE-PAI-1 groups.  $*P < 0.05$  and ns, no significance.

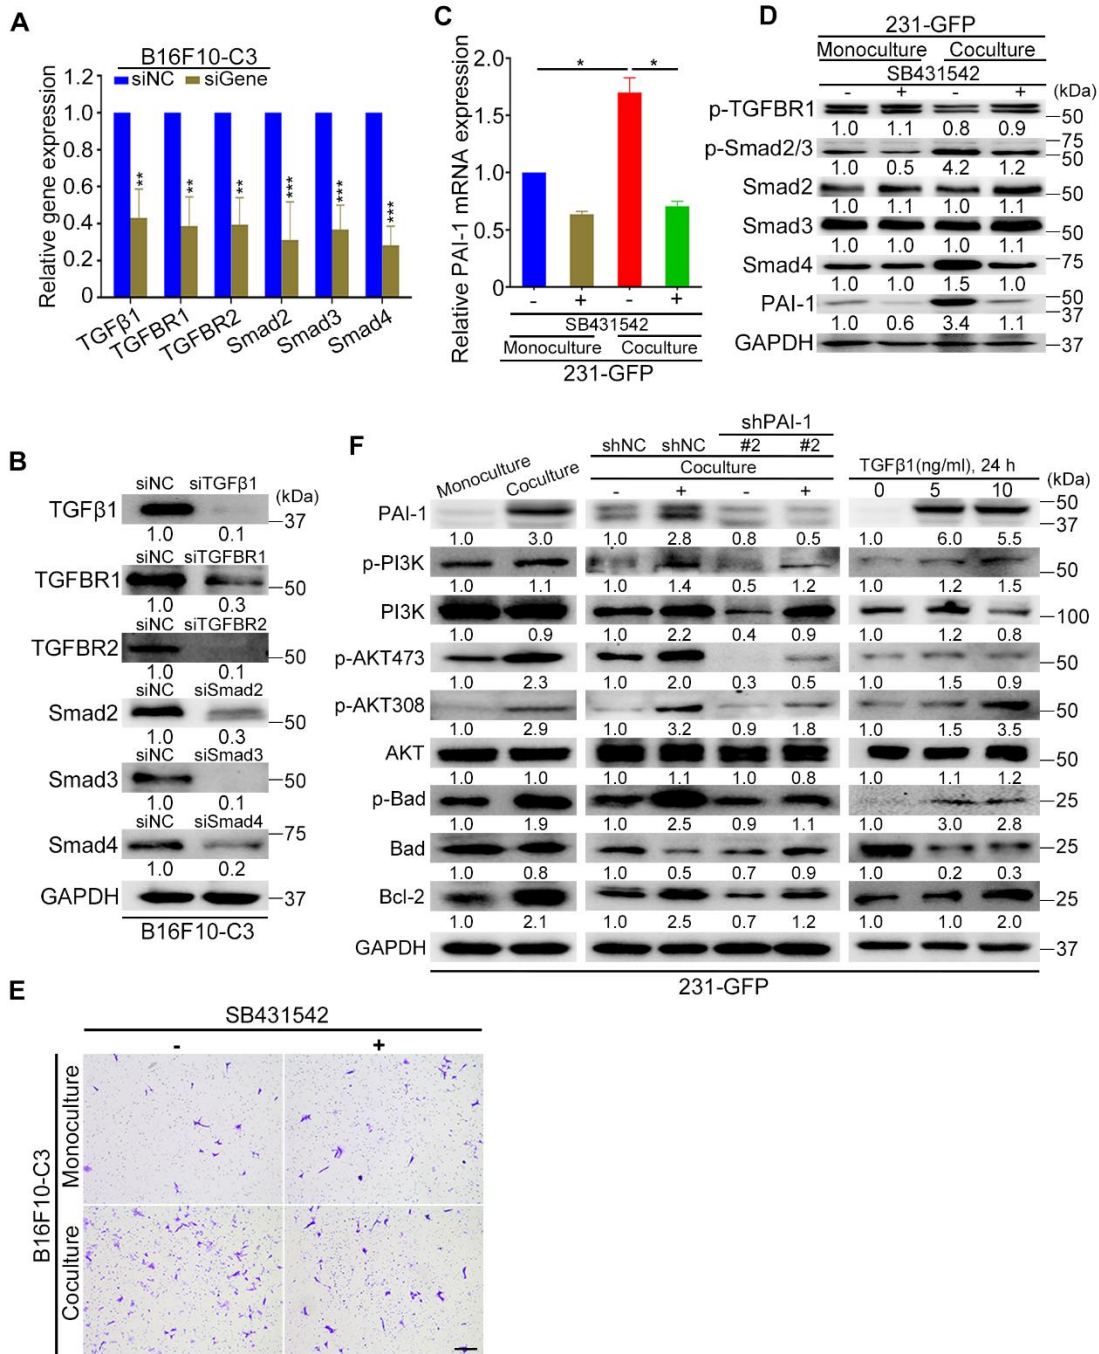

**Fig. S5.** Elucidating the signalling pathways of PAI-1. (**A** and **B**) mRNA and protein levels of target gene expression using siRNA treatment. (**C**) mRNA level of PAI-1 in 231-GFP cells after SB431542 treatment. (**D**) Protein levels of p-TGFBR1, p-Smad2/3, Smad2-4, and PAI-1 after SB431542 treatment in 231-GFP cells. (**E**) Transwell migration assay of B16F10-C3 cells after SB431542 treatment. Scale bar, 200  $\mu$ m. (**F**) Protein levels of the PI3K/AKT survival pathway between monocultured and cocultured, knockdown of PAI-1 and recombinant TGF $\beta$ 1 protein treatment in 231-GFP cells. The data are shown as the mean  $\pm$  SD. \* $P$  < 0.05, \*\* $P$  < 0.01, \*\*\* $P$  < 0.001 and ns, not significant.



## Supplementary tables

**Table S1** List of primers for qRT-PCR.

| Primer name       | Sequence information (5'-3') |
|-------------------|------------------------------|
| M-SERPINE2-F      | ACATGGGATCGCGTCCATC          |
| M-SERPINE2-R      | GCCACGGTCACAATGTCTTT         |
| M-PAI-1-F         | TTCAGCCCTTGCTTGCCTC          |
| M-PAI-1-R         | ACACTTTTACTCCGAAGTCGGT       |
| H-PAI-1-F         | CCTGGGCACTTACAGGAAGG         |
| H-PAI-1-R         | GGTCCGATTCGTCGTCAAATAAC      |
| M-GAPDH-F         | AATGGATTTGGACGCATTGGT        |
| M-GAPDH-R         | TTTGCCTGGTACGTGTTGAT         |
| H-GAPDH-F         | AGCCACATCGCTCAGACA           |
| H-GAPDH-R         | GCCCAATACGACCAAATCC          |
| M-TGF $\beta$ 1-F | CTCCCGTGGCTTCTAGTGC          |
| M-TGF $\beta$ 1-R | GCCTTAGTTTGGACAGGATCTG       |
| M-TGFBR1-F        | TCTGCATTGCACTTATGCTGA        |
| M-TGFBR1-R        | AAAGGGCGATCTAGTGATGGA        |
| M-TGFBR2-F        | CCGCTGCATATCGTCCTGTG         |
| M-TGFBR2-R        | AGTGGATGGATGGTCCTATTACA      |
| M-Smad2-F         | ATGTCGTCCATCTTGCCATTC        |
| M-Smad2-R         | AACCGTCCTGTTTTCTTTAGCTT      |
| M-Smad3-F         | CACGCAGAACGTGAACACC          |
| M-Smad3-R         | GGCAGTAGATAACGTGAGGGA        |
| M-Smad4-F         | ACACCAACAAGTAACGATGCC        |
| M-Smad4-R         | GCAAAGGTTTCACTTCCCCA         |
| H-TGF $\beta$ 1-F | CAATTCCTGGCGATACCTCAG        |
| H-TGF $\beta$ 1-R | GCACAACTCCGGTGACATCAA        |
| H-TGFBR1-F        | GCTGTATTGCAGACTTAGGACTG      |
| H-TGFBR1-R        | TTTTTGTTCCTACTCTGTGGTT       |
| H-TGFBR2-F        | AAGATGACCGCTCTGACATCA        |
| H-TGFBR2-R        | CTTATAGACCTCAGCAAAGCGAC      |
| H-Smad2-F         | CCGACACACCGAGATCCTAAC        |
| H-Smad2-R         | GAGGTGGCGTTTCTGGAATATAA      |
| H-Smad3-F         | TGGACGCAGGTTCTCCAAAC         |
| H-Smad3-R         | CCGGCTCGCAGTAGGTAAC          |
| H-Smad4-F         | CCACCAAGTAATCGTGCATCG        |
| H-Smad4-R         | TGGTAGCATTAGACTCAGATGGG      |

**Table S2** List of shRNA and siRNA.

| shRNA name | TRC number | Sequence information (5'-3') |
|------------|------------|------------------------------|
| M-PAI-1#1  |            | CCCTCTACTTCAGTGGCCAAT        |
| M-PAI-1#2  | 0000305135 | AGTGGAAAGAGCCAGATTTAT        |
| H-PAI-1#1  | 0000331004 | TCTCTGCCCTCACCAACATTC        |
| H-PAI-1#2  | 0000331006 | AGACCAACAAGTTCAACTATA        |
| shCtrl     | SHC002     | CAACAAGATGAAGAGCACCAA        |
| M-siTGFβ1  |            | ACCCCACUGAUACGCCUGAGTT       |
| M-siTGFBR1 |            | GAAUUAATAAACAUAUGUACACTT     |
| M-siTGFBR2 |            | CGCCAACAACAUAACCACAATT       |
| M-siSmad2  |            | AUCGCAUACUAUGAACUAACTT       |
| M-siSmad3  |            | AAUAUUCAGAAACCCACCUTT        |
| M-siSmad4  |            | CUACCCAAGCGCGUAUUAUAATT      |
| siCtrl     |            | UUCUCCGAACGUGUCACGUTT        |

**Table S3** List of overexpression plasmids.

| Vector name | Transcript ID | Sequence length |
|-------------|---------------|-----------------|
| M-PAI-1     | NM_008871.2   | 1209 bp         |

**Table S4** Analysis of primary tumor formation of B16F10-C3 cells in orthotopic tumor models.

| Group               | With tumor | Without tumor | P value             |
|---------------------|------------|---------------|---------------------|
| Monoculture         | 5          | 1             | 0.9999 <sup>a</sup> |
| Coculture           | 6          | 0             |                     |
| shNC                | 3          | 2             | 0.0357 <sup>a</sup> |
| Coculture shNC      | 5          | 0             |                     |
| Coculture shPAI-1#2 | 1          | 4             |                     |
| EV                  | 3          | 4             | 0.5921 <sup>a</sup> |
| OE-PAI-1            | 4          | 2             |                     |

<sup>a</sup>Chi-square test p value is indicated.

**Table S5** Analysis of primary tumor formation of 231-GFP cells in orthotopic tumor models.

| Group               | With tumor | Without tumor | P value             |
|---------------------|------------|---------------|---------------------|
| Monoculture         | 7          | 5             | 0.6828 <sup>a</sup> |
| Coculture           | 10         | 4             |                     |
| shNC                | 9          | 7             | 0.0042 <sup>a</sup> |
| Coculture shNC      | 10         | 6             |                     |
| Coculture shPAI-1#2 | 1          | 13            |                     |

<sup>a</sup>Chi-square test p value is indicated.

**Table S6** Correlation of PAI-1 expression with clinicopathological features of melanoma patients.

|                               | PAI-1       |             |                    | Total | P value             |
|-------------------------------|-------------|-------------|--------------------|-------|---------------------|
|                               | Negative    | Positive    | Positive ratio (%) |       |                     |
| <b>Sample types</b>           |             |             |                    |       |                     |
| Primary                       | 51          | 39          | 43.3               | 90    | 0.0165 <sup>a</sup> |
| Metastasis                    | 4           | 13          | 76.5               | 17    |                     |
| Total                         | 55          | 52          | 48.6               | 107   |                     |
| <b>Lymph node involvement</b> |             |             |                    |       |                     |
| Negative                      | 54          | 40          | 42.6               | 94    | 0.2411 <sup>a</sup> |
| Positive                      | 5           | 8           | 61.5               | 13    |                     |
| Total                         | 59          | 48          | 44.8               | 107   |                     |
| <b>Age (mean ± SD)</b>        |             |             |                    |       |                     |
|                               | 63.8 ± 13.2 | 60.2 ± 15.4 |                    |       | 0.1999 <sup>b</sup> |
| <b>Age (range)</b>            |             |             |                    |       |                     |
|                               | 30–82       | 29–92       |                    |       |                     |

**Table S7** Correlation of PAI-1 expression with clinicopathological features of TNBC patients.

|                               | PAI-1       |             |                    | Total | P value             |
|-------------------------------|-------------|-------------|--------------------|-------|---------------------|
|                               | Negative    | Positive    | Positive ratio (%) |       |                     |
| <b>Grade</b>                  |             |             |                    |       |                     |
| I-II                          | 4           | 0           | 0.0                | 4     | 0.0214 <sup>a</sup> |
| II                            | 25          | 4           | 13.8               | 29    |                     |
| II-III                        | 6           | 6           | 50                 | 12    |                     |
| Total                         | 35          | 10          | 22.2               | 45    |                     |
| <b>Lymph node involvement</b> |             |             |                    |       |                     |
| Negative                      | 25          | 10          | 28.6               | 35    | 0.089 <sup>a</sup>  |
| Positive                      | 10          | 0           | 0.0                | 10    |                     |
| Total                         | 35          | 10          | 22.2               | 45    |                     |
| <b>Age (mean ± SD)</b>        |             |             |                    |       |                     |
|                               | 46.1 ± 12.8 | 53.8 ± 13.7 |                    |       | 0.126 <sup>b</sup>  |
| <b>Age (range)</b>            |             |             |                    |       |                     |
|                               | 29-90       | 27-72       |                    |       |                     |
| <b>Size (mean ± SD, cm)</b>   |             |             |                    |       |                     |
|                               | 3.4 ± 1.3   | 3.7 ± 1.2   |                    |       | 0.516 <sup>b</sup>  |
| <b>Size (range)</b>           |             |             |                    |       |                     |
|                               | 0.4-6.7     | 1.2-5.3     |                    |       |                     |

<sup>a</sup>Chi-square test p value is indicated.

<sup>b</sup>Age and tumor size were calculated by unpaired Student's t test.
